# Supplementary material
Source: ML conference proceedings conference paper supplement (https://openaccess.thecvf.com/content/CVPR2024/html/Zheng_Free3D_Consistent_Novel_CVPR_2024_paper.html)
Supplement: Supplementary file 1 [file Zheng_Free3D_Consistent_Novel_CVPR_2024_supplemental.pdf]

# Free3D: Consistent Novel View Synthesis without 3D Representation

## Supplementary Material

The supplementary materials are organized as follows:

- A video to illuminate our work and the rendered videos.
- Introduction for the baseline diffusion model.
- Experiment details.
- Results for more single view NVS.

### A. Background: Diffusion Generators

In order to achieve sufficient generalization to operate in an *open-set* category setting, Free3D builds on a pre-trained 2D image generation, and specifically Stable Diffusion (SD) [51]. SD is a Latent Diffusion Model (LDM) trained on billions of text-image pairs from LAION-5B [56]. It consists of two stages. The first stage embeds the given image  $x_0 \in \mathbb{R}^{H \times W \times 3}$  in a latent space  $z \in \mathbb{R}^{\frac{H}{f} \times \frac{W}{f} \times c}$  through an autoencoder  $\mathcal{E} : x \mapsto z$ , paired with a decoder  $\mathcal{D} : z \mapsto x$ , which reconstructs the image ( $x = \mathcal{D} \circ \mathcal{E}(x)$ ). The second stage uses diffusion to model the distribution  $p(z|y)$  over such latent codes, where  $y$  lumps any conditioning information (e.g., text, image, or viewpoint). Diffusion involves a forward noising process that gradually perturbs the given latent  $z_0 = z$  by adding the Gaussian noise  $\epsilon$  in a Markovian fashion:

$$z_t = \sqrt{\bar{\alpha}_t} z_0 + \sqrt{1 - \bar{\alpha}_t} \epsilon, \quad \epsilon \sim \mathcal{N}(0, I), \quad (\text{A.1})$$

producing a sequence  $z_t, t = 1, \dots, T$ , and  $\bar{\alpha}_t := \prod_{s=1}^t \alpha_s$ ,  $\alpha_t := 1 - \beta_t$  denote the noise strength at different steps.  $\{\beta_t\}_{t=1}^T$  is a pre-defined variance schedule. Ultimately,  $p(z_T|y)$  is approximately normal; we can thus easily sample  $z_T$ , and then go back to  $z_0$  via the backward denoising process using the predicted noise:

$$z_{t-1} = \frac{1}{\sqrt{\alpha_t}} \left( z_t - \frac{1 - \alpha_t}{\sqrt{1 - \bar{\alpha}_t}} \epsilon_\theta(z_t, t, y) \right) + \sigma_t \epsilon, \quad (\text{A.2})$$

where  $\epsilon_\theta$  is typically an UNet [16], and  $\{\sigma_t\}_{t=1}^T$  is another control of noise  $\epsilon$ , which is also a pre-defined schedule corresponding to the schedule  $\beta_t$  and introduces uncertainty for the synthesis of different views. Similar to the vanilla DDPM [24], SD uses the following training objective to optimize the UNet  $\epsilon_\theta$ :

$$\mathcal{L} = \mathbb{E}_{z_0, y, \epsilon \sim \mathcal{N}(0, I), t} [\|\epsilon - \epsilon_\theta(z_t, t, y)\|_2^2], \quad (\text{A.3})$$

### B. Experiment Details

The Stable Diffusion (SD), originally trained for text-to-images generation, requires adaptation to suit image-conditional NVS tasks. Following Zero-1-to-3 [38], we utilize the image-to-image Stable Diffusion checkpoints<sup>3</sup>. Our

baseline code is built upon the Zero-1-to-3 [38]<sup>4</sup>. Hyper-parameters are configured in accordance with the default settings of the baseline code. The *ray conditioning normalisation* (RCN) is incorporated into each ResNet block within the diffusion Unet  $\epsilon_\theta$ , while the *pseudo-3D cross-attention* is introduced after the original CLIP-conditional cross-attention layer (as illustrated in Fig. 2).

Instead of directly providing  $r_{uv} = (\mathbf{o} \times \mathbf{d}_{uv}, \mathbf{d}_{uv})$  to the network for modulating the features, we embed them into higher-dimensional features, following the approach of NeRF [43] and LFN [60]. In particular, we employ the element-wise mapping  $\mathbf{r} \mapsto [\mathbf{r}, \sin(f_1 \pi \mathbf{r}), \cos(f_1 \pi \mathbf{r}), \dots, \sin(f_K \pi \mathbf{r}), \cos(f_K \pi \mathbf{r})]$ , where  $K$  is the number of Fourier bands, and  $f_k$  is equally spaced to the sampling rate. In all experiments,  $K$  is set as 6, leading to  $78 = 2 \times 3 \times K_o + 3 + 2 \times 3 \times K_d + 3 = (6 + 6) \times 6 + 6$  dimensional features (as depicted in Fig. 2(a)).

**Training Details.** Our model was trained on  $4 \times$  A40 48GB GPUs in two stages: **i)** We first finetuned the model with RCN, utilizing a batch size of 256 for 3 days on random camera viewpoints, enhancing the pose accuracy for target views. **ii)** Subsequently, the pseudo-3D cross-attention was finetuned on the 4 nearest views, employing a batch size of 192 for 2 days. In the second stage, different views from one instance were perturbed by adding noise from the same time step  $t$ .

In an alternative approach during the first stage, we initially attempted to jointly train the pseudo-3D cross-attention with random camera viewpoints. However, the performance is worse than the configuration  $\mathbb{D}$ . We believe this is because the camera viewpoints have a large gap along these random views in the rendered datasets, making it harder to calculate the similarity across these frames. In all experiments, we use AdamW with a learning rate of  $10^{-5}$  for the old parameters in the original diffusion Unet  $\epsilon_\theta$  and a  $10 \times$  larger learning rate for new parameters, namely the parameters for RCN and Pseudo-3D cross-attention.

**Inference Details.** At the testing phase, we configure the diffusion model with a sampling step set to  $T = 50$ . The computational time for rendering a novel view using our proposed Free3D is approximately 3 seconds, utilizing an A6000 GPU. For a fair comparison, all models are evaluated on the same A6000 GPU employing the same batch size of 4. This batch size is chosen due to the operational constraints of syndreamer [39], which can only run such a

<sup>3</sup><https://huggingface.co/spaces/lambdalabs/stable-diffusion-image-variations>

<sup>4</sup><https://github.com/cvlab-columbia/zero123>

small size. Additionally, we also utilize the CFG with a scale  $s = 3$  to guide the rendering for each target view.

**360° Video Rendering.** To render a 360° video, we establish a circle trajectory by uniformly subdividing the azimuth  $\phi$  into discrete intervals of  $\frac{2\pi}{50} = 7.2^\circ$ , while the elevation  $\theta$  and the distance  $z$  remain fixed. For each 3D instance, we replicate the same latent variable  $z_T$  over 50 frames, which can minimize temporal flickering across different views. Additionally, we also set the parameter  $\sigma_t$  in Eq. (A.2) to zero, thereby further mitigating uncertainty introduced by varying noise patterns.

## C. More Visual Results

**More results on Objaverse NVS.** In Figs. C.1 and C.2, we present more visual comparisons on Objaverse datasets [15] that given one input image and the target viewpoint, all models render the target novel view. This is an extension of Fig. 4 in the main paper.

Here, all examples shown come from the corresponding test-set following the split, as in Zero-1-to-3 [38]. These examples are good evidence that our Free3D is suitable for *open-set* categories NVS, where it can generate semantically reasonable content with visually realistic appearances across various categories. More importantly, compared to existing state-of-the-art methods, the Free3D provides better results with a more precise pose for the target novel view. This observation suggests that the RCN is able to provide better viewpoint perception for the NVS.

**More results on OmniObject3D and GSO NVS.** In Figs. C.3 and C.4, we show additional comparison results on OmniObject3D [73] and GSO [17] datasets, respectively. This is an extension of Fig. 5 in the main paper, which demonstrates the generalizability of our Free3D on unseen datasets encompassing various categories.

As can be seen from these results, although the baseline Zero-1-to-3 [38] provides visually realistic appearances for all objects, the content is *not* always reasonable, and the pose is inaccurate in many cases. This indicates the global language token embedding with elevation  $\theta$ , azimuth  $\phi$ , and distance  $z$  is *not* so precise for the network to interpret and utilize the camera viewpoints. While the Zero123-XL [14] and consistent123 [69] enhance the quality by training on a larger dataset and employing multi-view diffusion, respectively, they do *not* directly deal with the camera pose perception. In contrast, our Free3D leverages the *per-pixel* ray conditioning as well as the modulating, which significantly improves the pose perception accuracy.

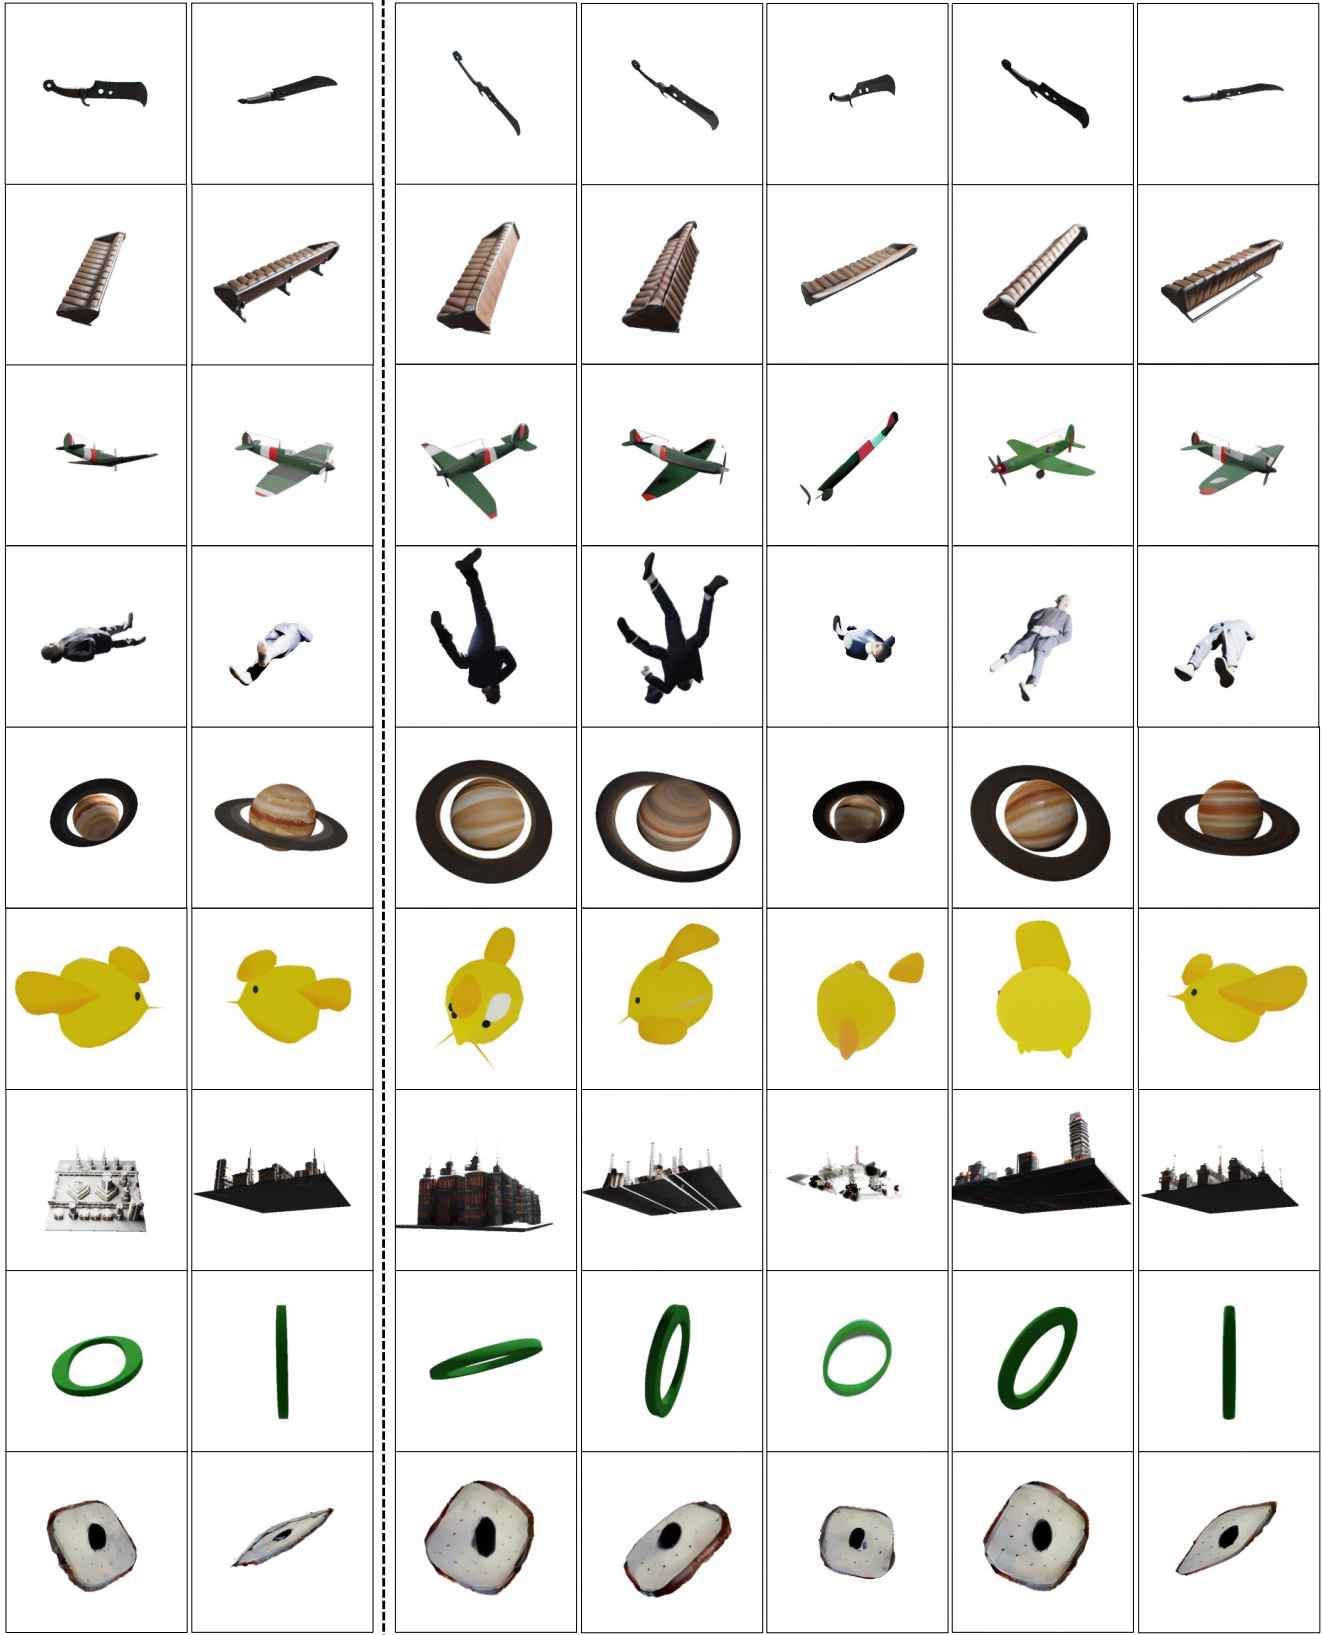

(a) Input View (b) Target View (c) Zero123[38] (d) Zero123-XL[14] (e) SyncDreamer[39] (f) Consistent123[69] (g) Ours Free3D

Figure C.1. **Qualitative comparisons on Objaverse dataset.** Given the exact target pose, the proposed Free3D significantly improves the pose precision compared to existing state-of-the-art methods.

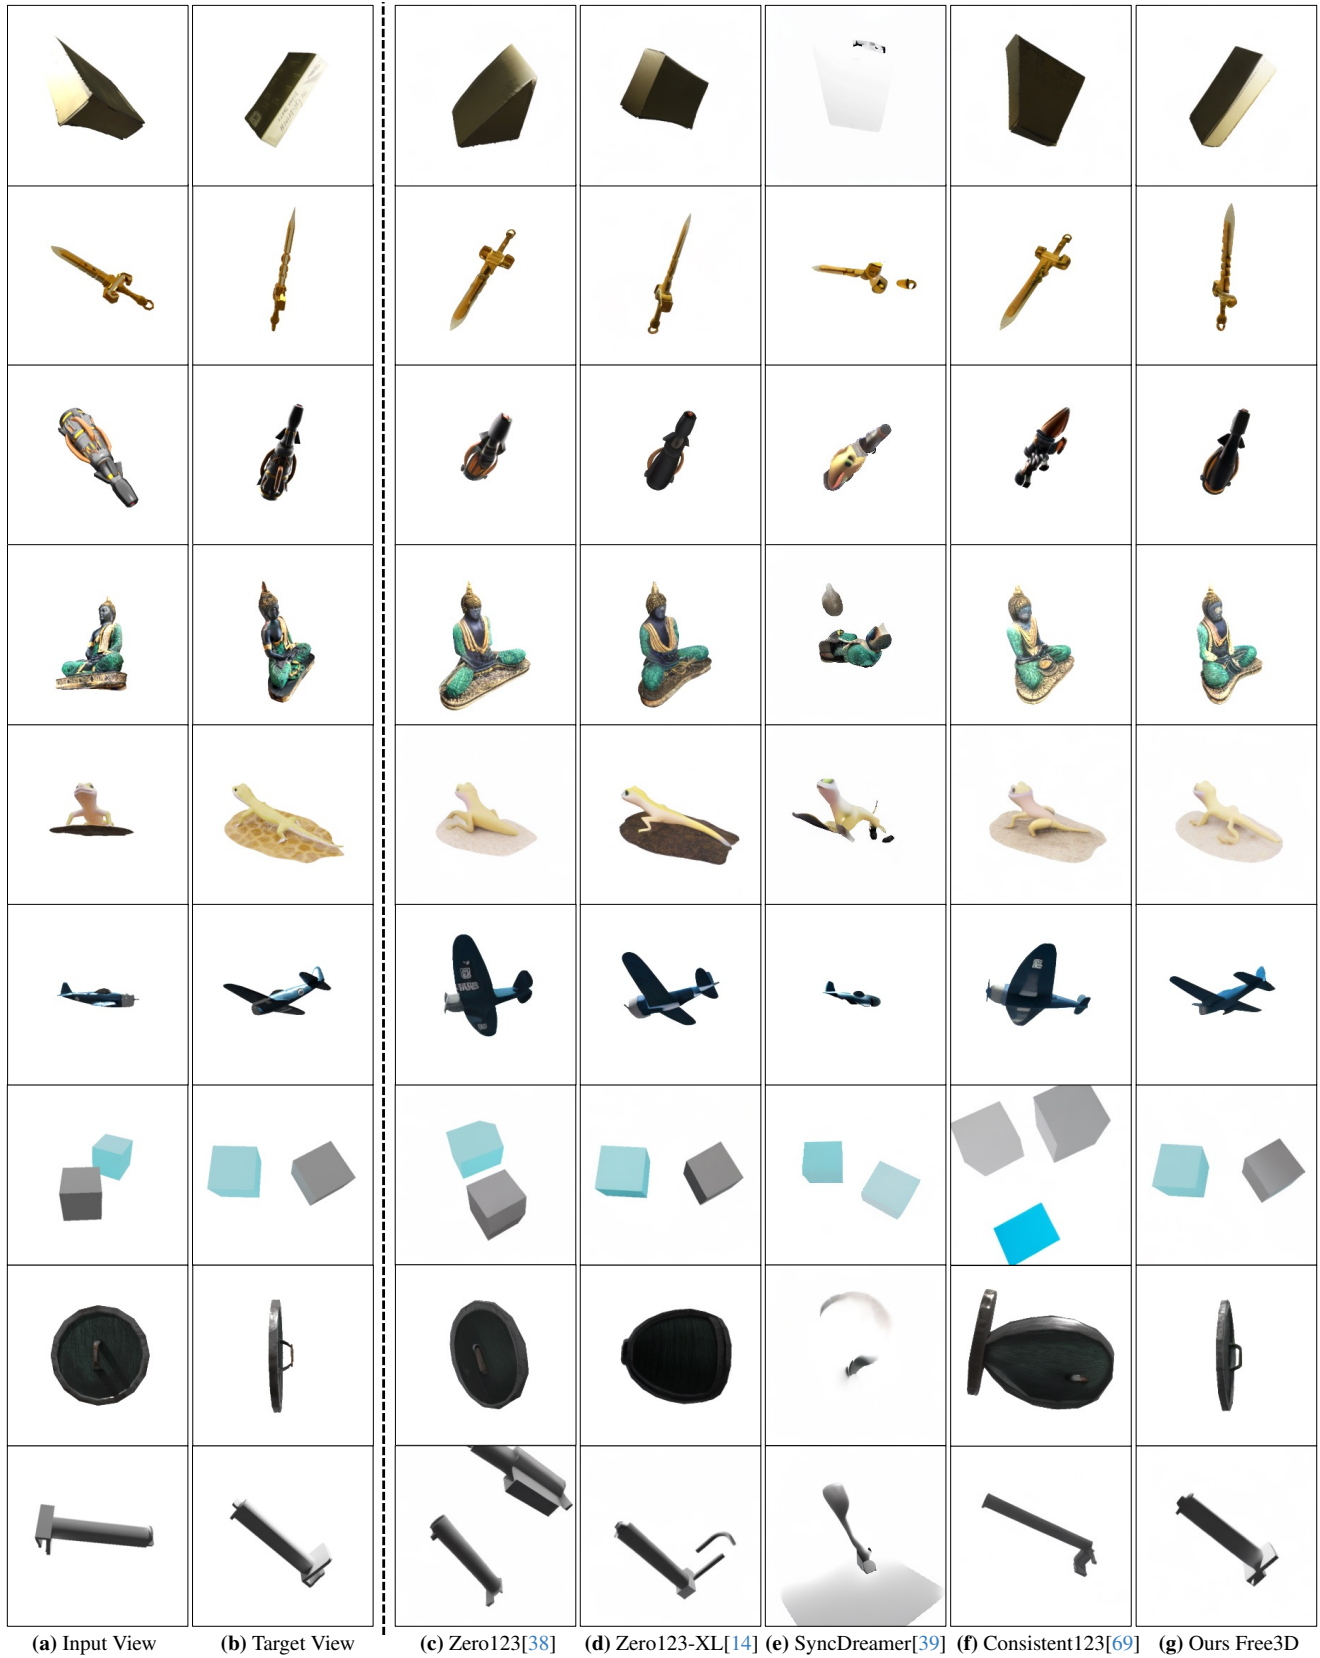

(a) Input View

(b) Target View

(c) Zero123[38]

(d) Zero123-XL[14]

(e) SyncDreamer[39]

(f) Consistent123[69]

(g) Ours Free3D

Figure C.2. **Qualitative comparisons on Objaverse dataset.** Given the exact target pose, the proposed Free3D significantly improves the pose precision compared to existing state-of-the-art methods.

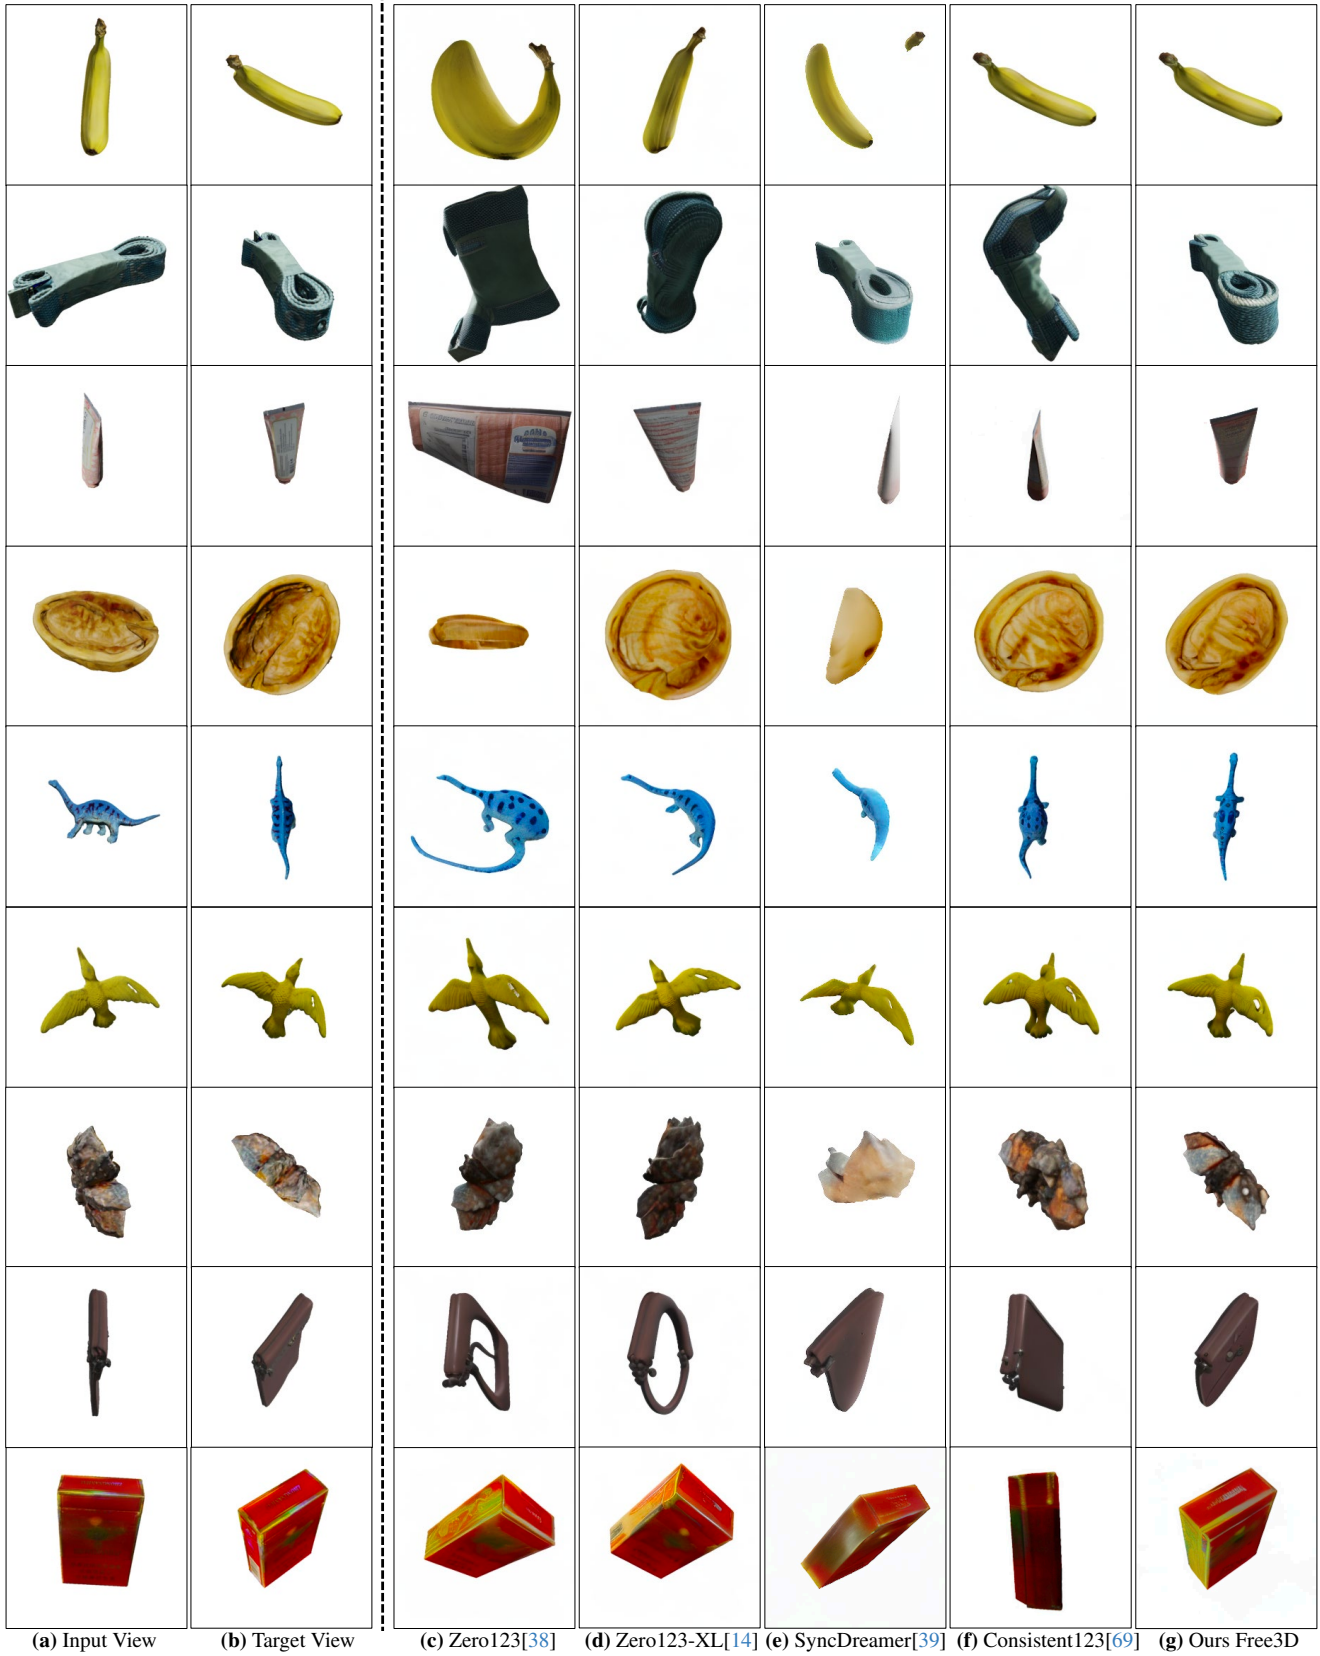

Figure C.3. **Qualitative comparisons on OmniObject3D dataset.** Given the exact target pose, the proposed Free3D significantly improves the pose precision compared to existing state-of-the-art methods.



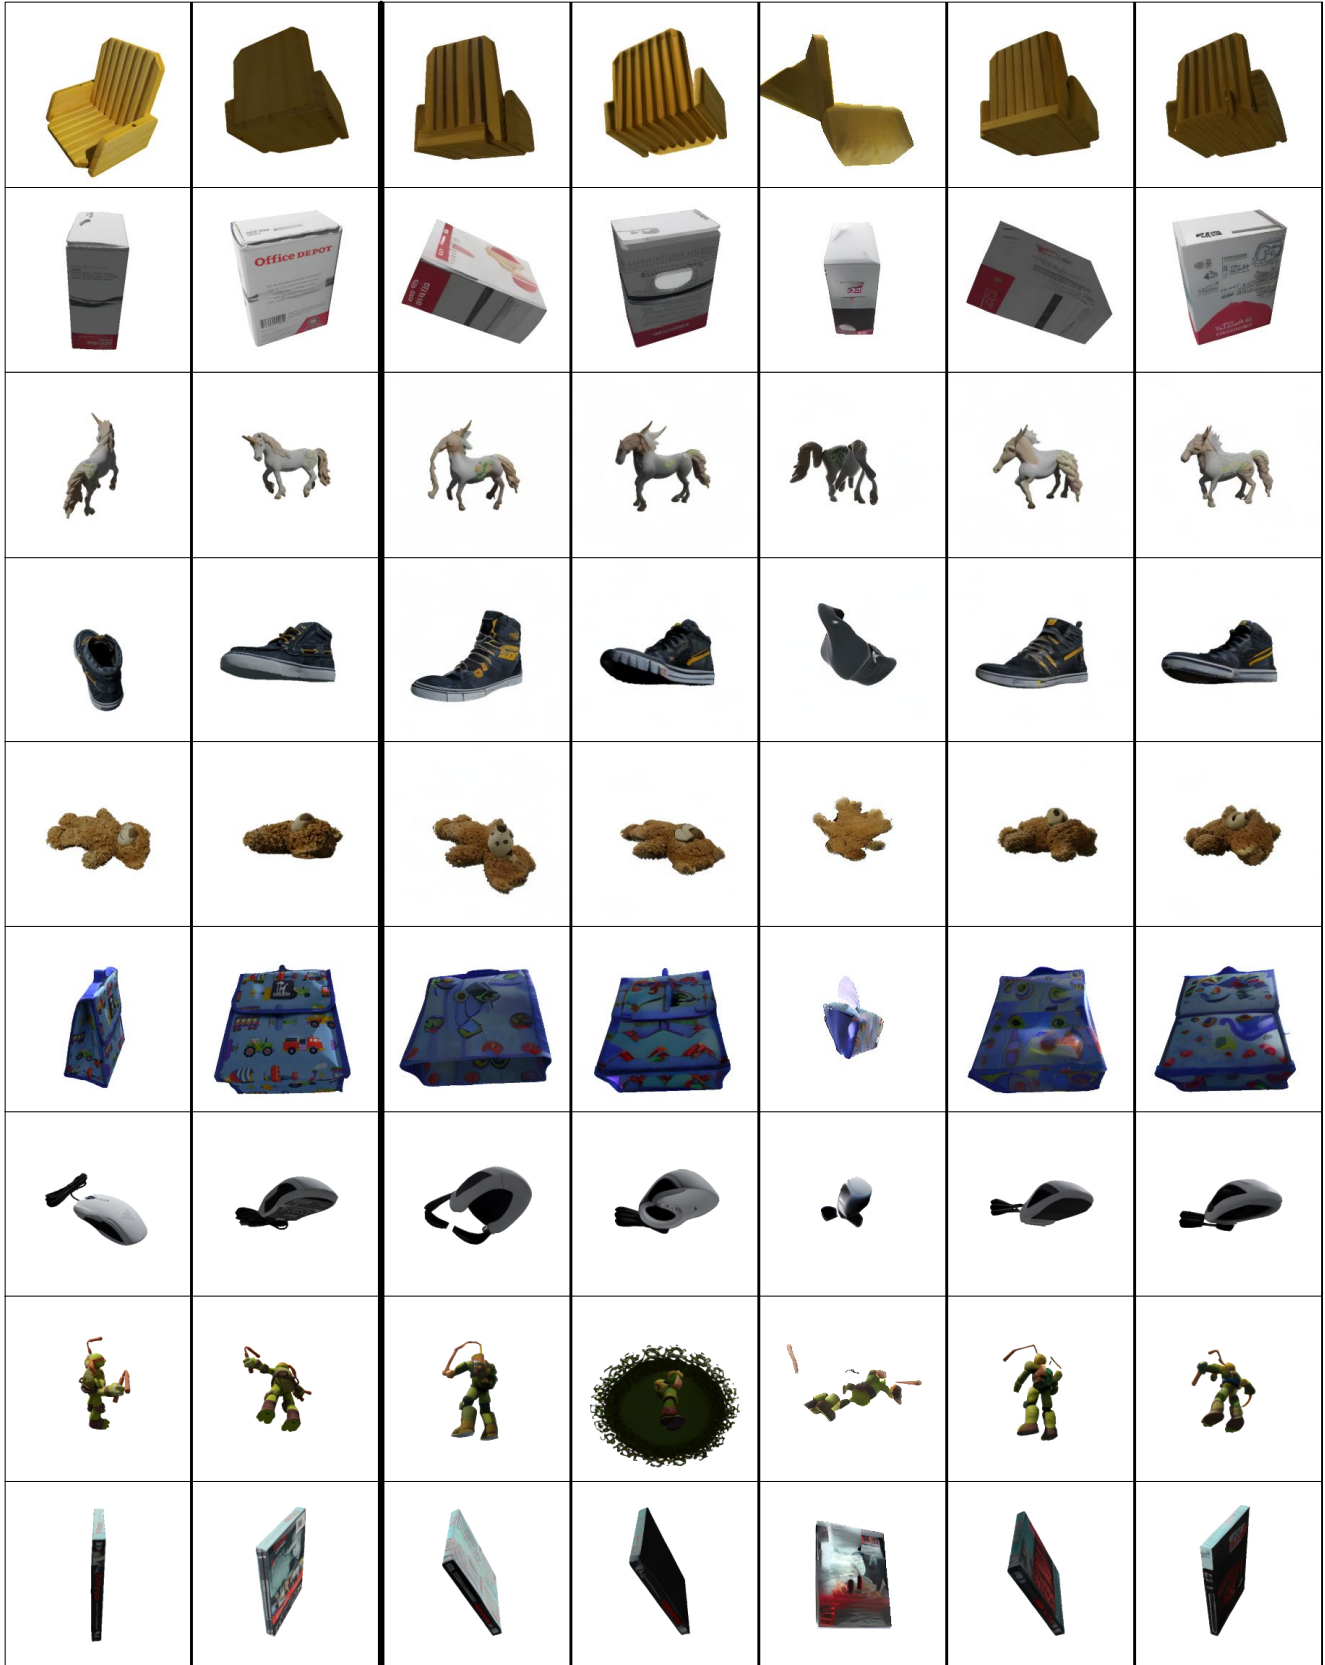

(a) Input View (b) Target View (c) Zero123[38] (d) Zero123-XL[14] (e) SyncDreamer[39] (f) Consistent123[69] (g) Ours Free3D

Figure C.4. **Qualitative comparisons on GSO dataset.** Given the exact target pose, the proposed Free3D significantly improves the pose precision compared to existing state-of-the-art methods.
